# Supplementary material for: Association of outpatient ACE inhibitors and angiotensin receptor blockers and outcomes of acute respiratory illness: a retrospective cohort study
Source: PubMed Central journal article supplement — BMJ Open. 2021 Mar 17;11(3):e044010. doi: 10.1136/bmjopen-2020-044010 (PMC7978099; doi:10.1136/bmjopen-2020-044010), 2021-03-17
Supplement: bmjopen-2020-044010supp001.pdf [file bmjopen-2020-044010supp001.pdf]

## Jeffery et al. Supplementary Materials

|                                                                                               |    |
|-----------------------------------------------------------------------------------------------|----|
| Table A: Acute viral respiratory illness diagnosis codes.....                                 | 2  |
| Figure A: Cohort flow chart (main cohort) .....                                               | 3  |
| Table B: Data underlying Manuscript Figure 1 (cohort comparison, main cohort).....            | 4  |
| Table C: Complete regression results (main cohort).....                                       | 5  |
| Figure B: Cohort flow diagram (falsification cohort).....                                     | 8  |
| Table D: Cohort characteristics. Values are numbers (percentages) except where specified..... | 9  |
| Figure C: Cohort comparison charts (falsification cohort) .....                               | 11 |
| Table E: Data underlying Figure 3 (cohort comparison, falsification cohort) .....             | 13 |
| Table F: Complete regression results (falsification cohort).....                              | 14 |

Table A: Acute viral respiratory illness diagnosis codes

| <b>Illness</b>              | <b>ICD10 codes</b>                      |
|-----------------------------|-----------------------------------------|
| SARS                        | B97.21, B97.29                          |
| Pneumonia (viral)           | J12*, J16, J16.8, J18*, J84.11, J84.111 |
| Bronchitis                  | J20*, J40                               |
| Lower respiratory infection | J22, J44.0, J47.0                       |
| Influenza                   | J09*, J10*, J11*                        |

Figure A: Cohort flow chart (main cohort)

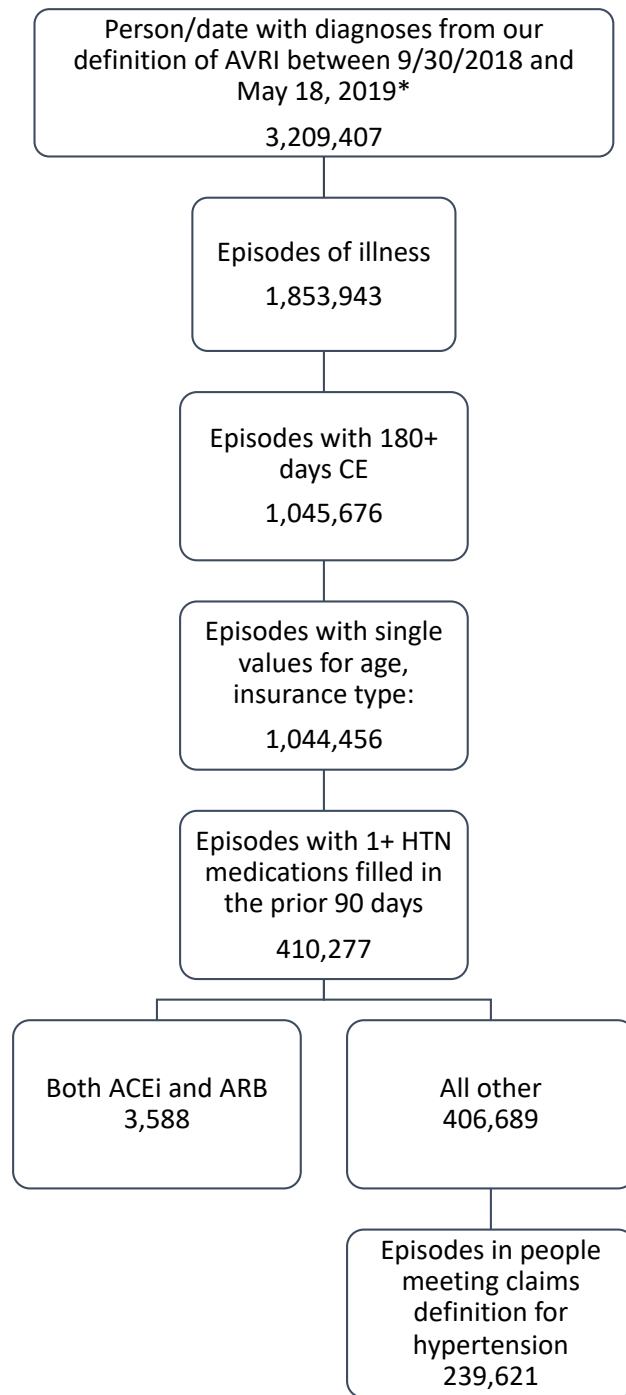

\* Influenza season dates for 2018/19, according to CDC

Table B: Data underlying Manuscript Figure 1 (cohort comparison, main cohort)

| Label                        | ACEi or ARB vs. other |                         |      |                     |                   | ACEi vs. ARB |                         |      |                     |                   |
|------------------------------|-----------------------|-------------------------|------|---------------------|-------------------|--------------|-------------------------|------|---------------------|-------------------|
|                              | Risk ratio            | 95% confidence interval |      | unadjusted p value* | adjusted p value† | Risk ratio   | 95% confidence interval |      | unadjusted p value* | adjusted p value† |
| Female                       | 0.94                  | 0.94                    | 0.95 | <0.001              | <0.001            | 0.87         | 0.86                    | 0.88 | <0.001              | <0.001            |
| Commercial                   | 1.43                  | 1.40                    | 1.46 | <0.001              | <0.001            | 1.07         | 1.05                    | 1.09 | <0.001              | <0.001            |
| New England                  | 0.88                  | 0.85                    | 0.92 | <0.001              | <0.001            | 1.14         | 1.08                    | 1.19 | <0.001              | <0.001            |
| Mid Atlantic                 | 0.87                  | 0.84                    | 0.89 | <0.001              | <0.001            | 0.87         | 0.84                    | 0.90 | <0.001              | <0.001            |
| South Atlantic               | 1.01                  | 1.00                    | 1.02 | 0.066               | 0.724             | 0.90         | 0.89                    | 0.91 | <0.001              | <0.001            |
| East North Central           | 0.91                  | 0.89                    | 0.93 | <0.001              | <0.001            | 1.18         | 1.15                    | 1.22 | <0.001              | <0.001            |
| East South Central           | 0.99                  | 0.96                    | 1.02 | 0.383               | 1.000             | 1.00         | 0.97                    | 1.04 | 0.857               | 1.000             |
| West North Central           | 0.92                  | 0.89                    | 0.95 | <0.001              | <0.001            | 1.34         | 1.29                    | 1.40 | <0.001              | <0.001            |
| West South Central           | 1.18                  | 1.16                    | 1.21 | <0.001              | <0.001            | 1.06         | 1.03                    | 1.08 | <0.001              | <0.001            |
| Mountain                     | 1.24                  | 1.19                    | 1.29 | <0.001              | <0.001            | 1.19         | 1.13                    | 1.25 | <0.001              | <0.001            |
| Pacific                      | 1.13                  | 1.08                    | 1.19 | <0.001              | <0.001            | 0.81         | 0.76                    | 0.86 | <0.001              | <0.001            |
| Unknown region               | 0.99                  | 0.62                    | 1.58 | 0.966               | 1.000             | 1.12         | 0.63                    | 1.98 | 0.704               | 1.000             |
| <25                          | 0.83                  | 0.64                    | 1.09 | 0.181               | 1.000             | 2.49         | 1.69                    | 3.66 | <0.001              | <0.001            |
| 25 to 44                     | 1.06                  | 1.01                    | 1.10 | 0.020               | 0.245             | 1.41         | 1.34                    | 1.49 | <0.001              | <0.001            |
| 45 to 64                     | 1.21                  | 1.19                    | 1.23 | <0.001              | <0.001            | 1.18         | 1.16                    | 1.20 | <0.001              | <0.001            |
| 65 to 74                     | 1.11                  | 1.10                    | 1.12 | <0.001              | <0.001            | 0.98         | 0.96                    | 0.99 | 0.002               | 0.030             |
| 75 to 85                     | 0.93                  | 0.92                    | 0.94 | <0.001              | <0.001            | 0.89         | 0.87                    | 0.90 | <0.001              | <0.001            |
| 85+                          | 0.65                  | 0.63                    | 0.66 | <0.001              | <0.001            | 0.86         | 0.84                    | 0.89 | <0.001              | <0.001            |
| White                        | 0.97                  | 0.96                    | 0.97 | <0.001              | <0.001            | 1.12         | 1.11                    | 1.12 | <0.001              | <0.001            |
| Black                        | 0.90                  | 0.88                    | 0.92 | <0.001              | <0.001            | 0.87         | 0.85                    | 0.89 | <0.001              | <0.001            |
| Hispanic                     | 1.41                  | 1.38                    | 1.45 | <0.001              | <0.001            | 0.75         | 0.73                    | 0.77 | <0.001              | <0.001            |
| Asian                        | 1.16                  | 1.09                    | 1.23 | <0.001              | <0.001            | 0.50         | 0.47                    | 0.54 | <0.001              | <0.001            |
| Unknown/other race/ethnicity | 1.00                  | 0.97                    | 1.02 | 0.684               | 1.000             | 1.06         | 1.03                    | 1.09 | <0.001              | <0.001            |
| Uncomplicated hypertension   | 1.06                  | 1.05                    | 1.06 | <0.001              | <0.001            | 1.02         | 1.02                    | 1.03 | <0.001              | <0.001            |
| Complicated hypertension     | 0.72                  | 0.70                    | 0.73 | <0.001              | <0.001            | 0.84         | 0.82                    | 0.86 | <0.001              | <0.001            |
| No diabetes                  | 0.90                  | 0.90                    | 0.91 | <0.001              | <0.001            | 0.98         | 0.97                    | 0.99 | <0.001              | <0.001            |
| Diabetes without CC          | 1.43                  | 1.40                    | 1.46 | <0.001              | <0.001            | 1.07         | 1.04                    | 1.09 | <0.001              | <0.001            |
| Diabetes with CC             | 1.08                  | 1.06                    | 1.09 | <0.001              | <0.001            | 1.01         | 0.99                    | 1.03 | 0.266               | 1.000             |
| Coronary artery disease      | 0.79                  | 0.78                    | 0.80 | <0.001              | <0.001            | 1.05         | 1.03                    | 1.07 | <0.001              | <0.001            |
| Congestive heart failure     | 0.65                  | 0.64                    | 0.66 | <0.001              | <0.001            | 0.98         | 0.96                    | 1.00 | 0.121               | 1.000             |
| Chronic pulmonary disease    | 0.80                  | 0.79                    | 0.80 | <0.001              | <0.001            | 0.97         | 0.95                    | 0.98 | <0.001              | <0.001            |
| Renal failure                | 0.64                  | 0.63                    | 0.65 | <0.001              | <0.001            | 0.85         | 0.83                    | 0.87 | <0.001              | <0.001            |
| Liver failure                | 0.65                  | 0.62                    | 0.68 | <0.001              | <0.001            | 1.14         | 1.08                    | 1.21 | <0.001              | <0.001            |
| Metastatic cancer            | 0.64                  | 0.61                    | 0.68 | <0.001              | <0.001            | 1.16         | 1.07                    | 1.25 | <0.001              | 0.002             |
| Lymphoma                     | 0.60                  | 0.56                    | 0.65 | <0.001              | <0.001            | 0.93         | 0.84                    | 1.03 | 0.172               | 1.000             |
| Solid tumor (non-metastatic) | 0.73                  | 0.71                    | 0.75 | <0.001              | <0.001            | 1.03         | 0.99                    | 1.07 | 0.097               | 0.971             |

\* P value is for the Pearson chi-squared test with one degree of freedom

† Adjusted p-values calculated following the Holm sequentially rejective procedure, treating all comparisons in this table as a single family of comparisons.

Table C: Complete regression results (main cohort)

|                         | Outcome/dependent variable |                           |                            |                           |                                  |
|-------------------------|----------------------------|---------------------------|----------------------------|---------------------------|----------------------------------|
|                         | Inpatient stay             | ICU or CCU use            | Acute respiratory distress | ARDS                      | Died same or next calendar month |
| Other HTN meds only     | ref.                       | ref.                      | ref.                       | ref.                      | ref.                             |
| ACEi                    | 0.938***<br>(0.910,0.967)  | 0.940**<br>(0.902,0.979)  | 0.93<br>(0.839,1.031)      | 0.963<br>(0.809,1.145)    | 0.785***<br>(0.745,0.827)        |
| ARB                     | 0.816***<br>(0.791,0.842)  | 0.823***<br>(0.789,0.859) | 0.783***<br>(0.703,0.872)  | 0.705***<br>(0.583,0.852) | 0.643***<br>(0.608,0.680)        |
| Female=1                | 0.901***<br>(0.878,0.925)  | 0.852***<br>(0.823,0.883) | 0.902*<br>(0.826,0.984)    | 0.933<br>(0.803,1.085)    | 0.803***<br>(0.768,0.839)        |
| <25                     | 1.602<br>(0.964,2.661)     | 2.085*<br>(1.101,3.949)   | 5.420**<br>(1.661,17.684)  | 2.639<br>(0.364,19.127)   | 1.148<br>(0.370,3.562)           |
| 25-44                   | 0.716***<br>(0.639,0.802)  | 0.738***<br>(0.630,0.863) | 0.745<br>(0.486,1.143)     | 0.817<br>(0.437,1.528)    | 0.553***<br>(0.402,0.760)        |
| 45-64                   | ref.                       | ref.                      | ref.                       | ref.                      | ref.                             |
| 65-74                   | 0.983<br>(0.943,1.025)     | 0.966<br>(0.914,1.021)    | 0.863*<br>(0.754,0.987)    | 0.893<br>(0.707,1.129)    | 1.333***<br>(1.222,1.454)        |
| 75+                     | 1.265***<br>(1.214,1.319)  | 1.062*<br>(1.006,1.122)   | 0.935<br>(0.819,1.068)     | 0.899<br>(0.712,1.136)    | 2.632***<br>(2.423,2.860)        |
| Medicare Advantage      | ref.                       | ref.                      | ref.                       | ref.                      | ref.                             |
| Commercial              | 0.566***<br>(0.537,0.598)  | 0.596***<br>(0.553,0.642) | 0.520***<br>(0.424,0.637)  | 0.792<br>(0.579,1.082)    | 0.574***<br>(0.510,0.646)        |
| Unk/Other Census Region | 1.076<br>(0.451,2.564)     | 2.319<br>(0.979,5.494)    |                            |                           | 1.598<br>(0.603,4.237)           |
| New England             | ref.                       | ref.                      | ref.                       | ref.                      | ref.                             |
| Mid Atlantic            | 0.997<br>(0.928,1.071)     | 1.082<br>(0.976,1.200)    | 1.356*<br>(1.062,1.733)    | 2.526***<br>(1.608,3.970) | 1.033<br>(0.926,1.153)           |
| South Atlantic          | 0.904**<br>(0.849,0.963)   | 1.250***<br>(1.142,1.368) | 1.223<br>(0.981,1.525)     | 1.567*<br>(1.022,2.405)   | 0.737***<br>(0.669,0.812)        |
| E North Central         | 1.081*<br>(1.010,1.156)    | 1.291***<br>(1.172,1.422) | 0.977<br>(0.766,1.246)     | 1.274<br>(0.803,2.019)    | 0.932<br>(0.840,1.034)           |
| E South Central         | 0.908*<br>(0.842,0.980)    | 1.122*<br>(1.007,1.250)   | 1.235<br>(0.949,1.606)     | 0.904<br>(0.529,1.546)    | 0.802***<br>(0.710,0.907)        |
| W North Central         | 1.167***<br>(1.082,1.258)  | 1.460***<br>(1.314,1.623) | 1.192<br>(0.915,1.552)     | 1.457<br>(0.886,2.394)    | 0.956<br>(0.849,1.078)           |
| W South Central         | 0.978<br>(0.912,1.048)     | 1.267***<br>(1.148,1.399) | 1.285*<br>(1.010,1.636)    | 1.426<br>(0.893,2.277)    | 0.773***<br>(0.691,0.864)        |
| Mountain                | 0.679***<br>(0.615,0.749)  | 0.951<br>(0.831,1.090)    | 0.628*<br>(0.425,0.927)    | 0.878<br>(0.450,1.713)    | 0.724***<br>(0.618,0.848)        |
| Pacific                 | 1.027                      | 1.526***                  | 1.018                      | 1.703                     | 0.884                            |

|                            | Outcome/dependent variable |                |                            |               |                                  |
|----------------------------|----------------------------|----------------|----------------------------|---------------|----------------------------------|
|                            | Inpatient stay             | ICU or CCU use | Acute respiratory distress | ARDS          | Died same or next calendar month |
| Unk/other race/ethnicity   | (0.932,1.131)              | (1.340,1.738)  | (0.711,1.456)              | (0.935,3.102) | (0.754,1.036)                    |
|                            | 0.948*                     | 0.992          | 0.886                      | 0.923         | 0.991                            |
|                            | (0.909,0.988)              | (0.938,1.050)  | (0.768,1.023)              | (0.724,1.177) | (0.923,1.065)                    |
| White                      | ref.                       | ref.           | ref.                       | ref.          | ref.                             |
| Black                      | 1.025                      | 0.993          | 0.99                       | 0.99          | 0.977                            |
|                            | (0.989,1.062)              | (0.946,1.043)  | (0.880,1.114)              | (0.810,1.210) | (0.918,1.040)                    |
| Hispanic                   | 0.781***                   | 0.981          | 0.995                      | 0.793         | 0.727***                         |
|                            | (0.745,0.818)              | (0.925,1.041)  | (0.860,1.153)              | (0.600,1.047) | (0.670,0.789)                    |
| Asian                      | 0.818***                   | 0.855*         | 0.775                      | 0.477         | 0.807*                           |
|                            | (0.741,0.904)              | (0.746,0.980)  | (0.530,1.135)              | (0.226,1.009) | (0.680,0.958)                    |
| No diabetes                | ref.                       | ref.           | ref.                       | ref.          | ref.                             |
| Diabetes without CC        | 1.026                      | 1.062*         | 1.011                      | 0.949         | 0.997                            |
|                            | (0.987,1.067)              | (1.008,1.120)  | (0.883,1.156)              | (0.747,1.207) | (0.929,1.069)                    |
| Diabetes with CC           | 1.210***                   | 1.182***       | 1.032                      | 1.216*        | 1.132***                         |
|                            | (1.174,1.248)              | (1.135,1.231)  | (0.931,1.143)              | (1.020,1.450) | (1.076,1.191)                    |
| Uncomp hypertension        | ref.                       | ref.           | ref.                       | ref.          | ref.                             |
| Comp hypertension          | 1.218***                   | 1.103***       | 1.063                      | 1.082         | 1.032                            |
|                            | (1.172,1.266)              | (1.049,1.160)  | (0.938,1.204)              | (0.881,1.329) | (0.971,1.097)                    |
| Coronary art dis           | 1.221***                   | 1.308***       | 1.182***                   | 1.018         | 1.378***                         |
|                            | (1.185,1.257)              | (1.258,1.360)  | (1.072,1.303)              | (0.857,1.209) | (1.313,1.446)                    |
| Congest heart fail         | 2.355***                   | 2.787***       | 2.838***                   | 2.922***      | 2.774***                         |
|                            | (2.284,2.429)              | (2.674,2.905)  | (2.551,3.158)              | (2.416,3.534) | (2.635,2.919)                    |
| Chronic pulmonary          | 1.948***                   | 1.741***       | 2.287***                   | 1.686***      | 1.073**                          |
|                            | (1.897,1.999)              | (1.680,1.805)  | (2.079,2.516)              | (1.437,1.978) | (1.025,1.123)                    |
| Renal failure              | 1.160***                   | 1.179***       | 1.108                      | 1.215         | 1.485***                         |
|                            | (1.118,1.202)              | (1.124,1.236)  | (0.985,1.245)              | (0.992,1.487) | (1.403,1.571)                    |
| Liver failure              | 1.435***                   | 1.496***       | 1.345**                    | 1.526**       | 2.626***                         |
|                            | (1.350,1.525)              | (1.389,1.612)  | (1.126,1.606)              | (1.139,2.043) | (2.420,2.848)                    |
| Metastatic cancer          | 2.173***                   | 2.015***       | 1.675***                   | 1.608*        | 3.563***                         |
|                            | (2.002,2.359)              | (1.825,2.225)  | (1.333,2.105)              | (1.052,2.457) | (3.214,3.949)                    |
| Lymphoma                   | 1.630***                   | 1.575***       | 1.395*                     | 1.427         | 1.591***                         |
|                            | (1.473,1.804)              | (1.392,1.783)  | (1.038,1.875)              | (0.860,2.365) | (1.378,1.837)                    |
| Non-metastatic solid tumor | 1.346***                   | 1.341***       | 1.346***                   | 1.046         | 1.896***                         |
|                            | (1.281,1.414)              | (1.259,1.429)  | (1.154,1.569)              | (0.785,1.395) | (1.766,2.036)                    |
| Constant                   | 0.086***                   | 0.030***       | 0.004***                   | 0.001***      | 0.018***                         |
|                            | (0.080,0.093)              | (0.027,0.034)  | (0.003,0.005)              | (0.001,0.002) | (0.016,0.020)                    |
| Number of episodes         | 236,843                    | 236,843        | 236,768                    | 236,768       | 236,433                          |
| Number of unique patients  | 202,629                    | 202,629        | 202,569                    | 202,569       | 202,289                          |

|                       | Outcome/dependent variable |                |                            |        |                                  |
|-----------------------|----------------------------|----------------|----------------------------|--------|----------------------------------|
|                       | Inpatient stay             | ICU or CCU use | Acute respiratory distress | ARDS   | Died same or next calendar month |
| p (for regression)    | <0.001                     | <0.001         | <0.001                     | <0.001 | <0.001                           |
| Pseudo R <sup>2</sup> | 0.105                      | 0.096          | 0.074                      | 0.053  | 0.151                            |

Odds ratios presented after logistic regression

\* p<0.05, \*\* p<0.01, \*\*\* p<0.001

Figure B: Cohort flow diagram (falsification cohort)

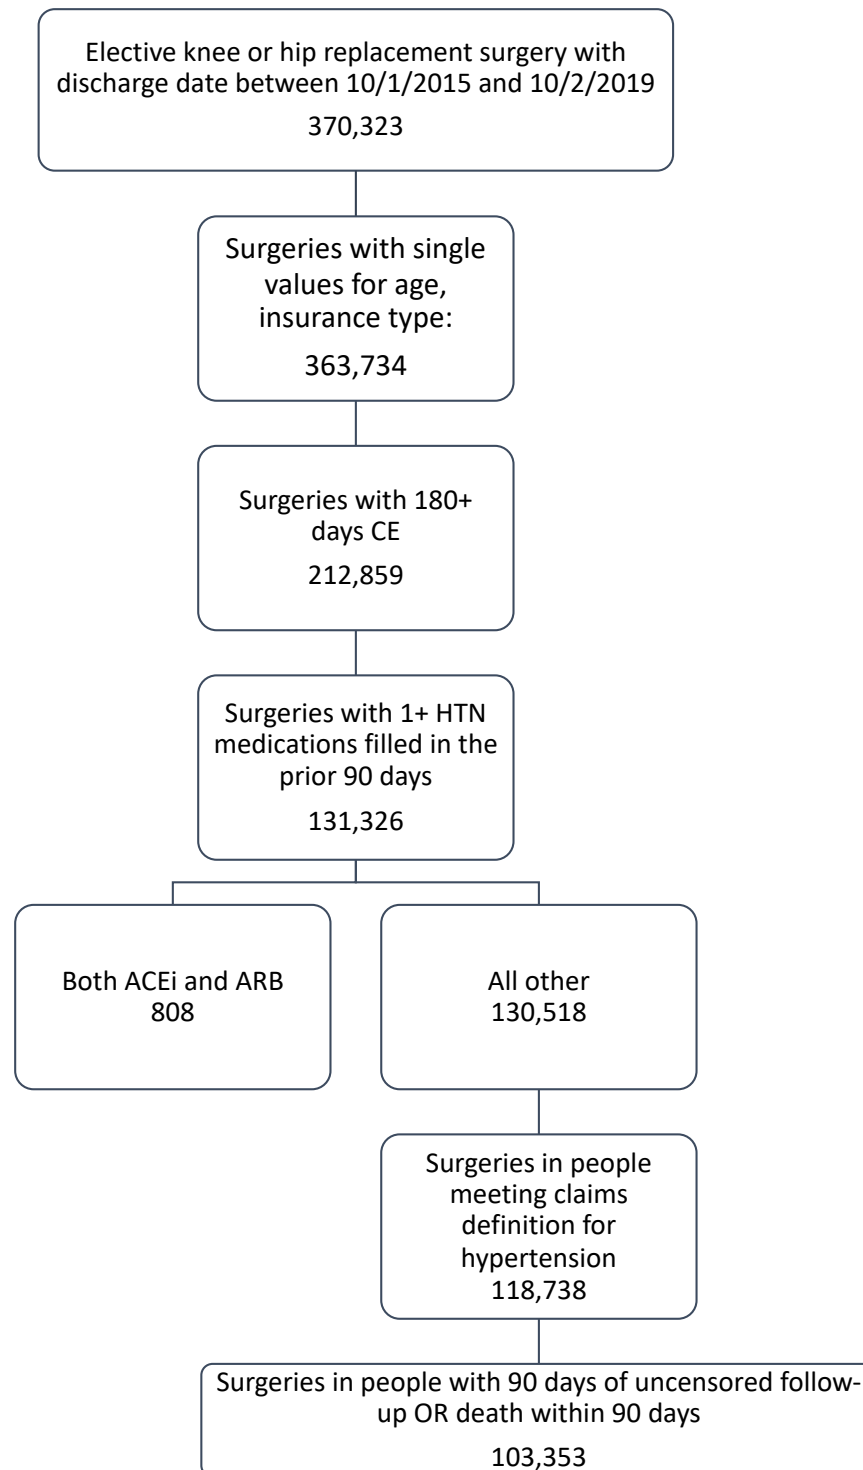



Table D: Cohort characteristics. Values are numbers (percentages) except where specified

|                           | Included cohort |                     |               |               | Total included cohort |
|---------------------------|-----------------|---------------------|---------------|---------------|-----------------------|
|                           | No HTN meds     | Other HTN meds only | ACEi          | ARB           |                       |
| Female                    | 10,774 (56.4)   | 20,857 (65.9)       | 20,982 (53.8) | 20,860 (63.9) | 62,699 (60.7)         |
| <b>Insurance type</b>     |                 |                     |               |               |                       |
| Medicare Advantage        | 12,553 (65.8)   | 24,312 (76.8)       | 28,014 (71.8) | 24,039 (73.6) | 76,365 (73.9)         |
| Commercial                | 6,534 (34.2)    | 7,347 (23.2)        | 11,012 (28.2) | 8,629 (26.4)  | 26,988 (26.1)         |
| <b>Census Division</b>    |                 |                     |               |               |                       |
| New England               | 634 (3.3)       | 1,371 (4.3)         | 1,644 (4.2)   | 1,128 (3.5)   | 4,143 (4.0)           |
| Mid Atlantic              | 1,375 (7.2)     | 2,656 (8.4)         | 2,809 (7.2)   | 2,737 (8.4)   | 8,202 (7.9)           |
| South Atlantic            | 5,398 (28.3)    | 9,894 (31.3)        | 11,445 (29.3) | 10,805 (33.1) | 32,144 (31.1)         |
| East North Central        | 3,789 (19.9)    | 6,893 (21.8)        | 8,449 (21.6)  | 6,555 (20.1)  | 21,897 (21.2)         |
| East South Central        | 921 (4.8)       | 1,744 (5.5)         | 2,009 (5.1)   | 1,892 (5.8)   | 5,645 (5.5)           |
| West North Central        | 2,915 (15.3)    | 3,737 (11.8)        | 4,901 (12.6)  | 3,094 (9.5)   | 11,732 (11.4)         |
| West South Central        | 1,788 (9.4)     | 2,361 (7.5)         | 3,556 (9.1)   | 3,004 (9.2)   | 8,921 (8.6)           |
| Mountain                  | 1,453 (7.6)     | 1,830 (5.8)         | 2,746 (7.0)   | 2,164 (6.6)   | 6,740 (6.5)           |
| Pacific and Unknown/other | 814 (4.2)       | 1,173 (3.7)         | 1,467 (3.7)   | 1,289 (3.9)   | 3,929 (3.7)           |
| <b>Age (categories)</b>   |                 |                     |               |               |                       |
| <44                       | 210 (1.1)       | 176 (0.6)           | 224 (0.6)     | 108 (0.3)     | 508 (0.5)             |
| 45-64                     | 6,442 (33.8)    | 8,253 (26.1)        | 11,689 (30.0) | 8,547 (26.2)  | 28,489 (27.6)         |
| 65-74                     | 7,561 (39.6)    | 13,003 (41.1)       | 16,792 (43.0) | 14,355 (43.9) | 44,150 (42.7)         |
| 75-84                     | 4,191 (22.0)    | 8,723 (27.6)        | 9,151 (23.4)  | 8,516 (26.1)  | 26,390 (25.5)         |
| 85+                       | 683 (3.6)       | 1,504 (4.8)         | 1,170 (3.0)   | 1,142 (3.5)   | 3,816 (3.7)           |
| <b>Race/ethnicity</b>     |                 |                     |               |               |                       |
| White                     | 14,327 (75.1)   | 23,182 (73.2)       | 29,474 (75.5) | 23,126 (70.8) | 75,782 (73.3)         |
| Black                     | 2,007 (10.5)    | 4,187 (13.2)        | 4,205 (10.8)  | 4,196 (12.8)  | 12,588 (12.2)         |
| Hispanic                  | 1,258 (6.6)     | 1,709 (5.4)         | 2,432 (6.2)   | 2,429 (7.4)   | 6,570 (6.4)           |
| Asian                     | 267 (1.4)       | 430 (1.4)           | 395 (1.0)     | 659 (2.0)     | 1,484 (1.4)           |
| Unknown/other             | 1,228 (6.4)     | 2,151 (6.8)         | 2,520 (6.5)   | 2,258 (6.9)   | 6,929 (6.7)           |
| <b>Comorbidities</b>      |                 |                     |               |               |                       |
| Uncomp hypertension       | 17,622 (92.3)   | 28,248 (89.2)       | 35,232 (90.3) | 29,088 (89.0) | 92,568 (89.6)         |
| Comp hypertension         | 1,465 (7.7)     | 3,411 (10.8)        | 3,794 (9.7)   | 3,580 (11.0)  | 10,785 (10.4)         |
| No diabetes               | 15,047 (78.8)   | 25,181 (79.5)       | 26,412 (67.7) | 22,207 (68.0) | 73,800 (71.4)         |
| Diabetes without CC       | 2,263 (11.9)    | 3,377 (10.7)        | 6,820 (17.5)  | 5,563 (17.0)  | 15,760 (15.2)         |
| Diabetes with CC          | 1,777 (9.3)     | 3,101 (9.8)         | 5,794 (14.8)  | 4,898 (15.0)  | 13,793 (13.3)         |
| Coronary artery disease   | 2,401 (12.6)    | 5,712 (18.0)        | 6,483 (16.6)  | 5,198 (15.9)  | 17,393 (16.8)         |
| Congestive heart failure  | 659 (3.5)       | 2,265 (7.2)         | 2,201 (5.6)   | 1,981 (6.1)   | 6,447 (6.2)           |
| Chronic pulmonary disease | 2,940 (15.4)    | 5,607 (17.7)        | 5,290 (13.6)  | 5,225 (16.0)  | 16,122 (15.6)         |
| Renal failure             | 1,431 (7.5)     | 3,612 (11.4)        | 3,726 (9.5)   | 3,568 (10.9)  | 10,906 (10.6)         |
| Liver failure             | 314 (1.6)       | 596 (1.9)           | 554 (1.4)     | 477 (1.5)     | 1,627 (1.6)           |
| Metastatic cancer         | 89 (0.5)        | 126 (0.4)           | 113 (0.3)     | 109 (0.3)     | 348 (0.3)             |
| Lymphoma                  | 89 (0.5)        | 130 (0.4)           | 130 (0.3)     | 118 (0.4)     | 378 (0.4)             |

|                                                                                                                                                       | Included cohort |                     |             |             | Total included cohort |
|-------------------------------------------------------------------------------------------------------------------------------------------------------|-----------------|---------------------|-------------|-------------|-----------------------|
|                                                                                                                                                       | No HTN meds     | Other HTN meds only | ACEi        | ARB         |                       |
| Non-metastatic solid tumor                                                                                                                            | 678 (3.6)       | 1,150 (3.6)         | 1,235 (3.2) | 1,148 (3.5) | 3,533 (3.4)           |
| Rheumatoid/arthritis/ collagen disorder                                                                                                               | 1,052 (5.5)     | 2,080 (6.6)         | 1,933 (5.0) | 1,823 (5.6) | 5,836 (5.6)           |
| <b>Episode length (days)</b>                                                                                                                          |                 |                     |             |             |                       |
| Mean (sd)                                                                                                                                             | 3.7 (10.8)      | 3.7 (4.0)           | 3.5 (2.7)   | 3.6 (3.0)   | 3.6 (3.3)             |
| Median (25th, 75th percentiles)                                                                                                                       | 3 (2, 4)        | 3 (2, 4)            | 3 (2, 4)    | 3 (2, 4)    | 3 (2, 4)              |
| <b>Number of days of healthcare with hypertension diagnosis, 180 days before index date</b>                                                           |                 |                     |             |             |                       |
| Mean (sd)                                                                                                                                             | 2.9 (2.8)       | 3.8 (3.4)           | 3.7 (3.0)   | 3.9 (2.9)   | 3.8 (3.1)             |
| Median (25th, 75th percentiles)                                                                                                                       | 2 (1, 3)        | 3 (2, 4)            | 3 (2, 4)    | 3 (2, 5)    | 3 (2, 4)              |
| N (episodes)                                                                                                                                          | 19,087          | 31,659              | 39,026      | 32,668      | 103,353               |
| N (unique people)                                                                                                                                     | 18,099          | 29,124              | 35,711      | 29,799      | 93,714                |
| * This group is not included in analyses; characteristics are presented for context                                                                   |                 |                     |             |             |                       |
| HTN hypertension; ACEi angiotensin-converting enzyme inhibitors; ARB angiotensin receptor blockers; CC Complicating conditions; sd standard deviation |                 |                     |             |             |                       |

Figure C: Cohort comparison charts (falsification cohort)

Rate ratios comparing baseline characteristics of Figure Ca people taking ACEis or ARBs to people taking other HTN medications and Figure Cb people taking ACEis to people taking ARBs. 95% confidence intervals are not adjusted for multiple comparisons

Figure Ca: The comparisons for six characteristics are not statistically significant after multiple comparison adjustment: East North Central (unadjusted  $p=0.002$ ; adjusted  $p=0.07$ ), West North Central (unadjusted  $p=0.002$ ; adjusted  $p=0.07$ ), uncomplicated hypertension (unadjusted  $p=0.02$ ; adjusted  $p=0.39$ ), complicated hypertension (unadjusted  $p=0.02$ ; adjusted  $p=0.39$ ), metastatic cancer (unadjusted  $p=0.02$ ; adjusted  $p=0.48$ ), solid tumor no mets (unadjusted  $p=0.01$ ; adjusted  $p=0.31$ )

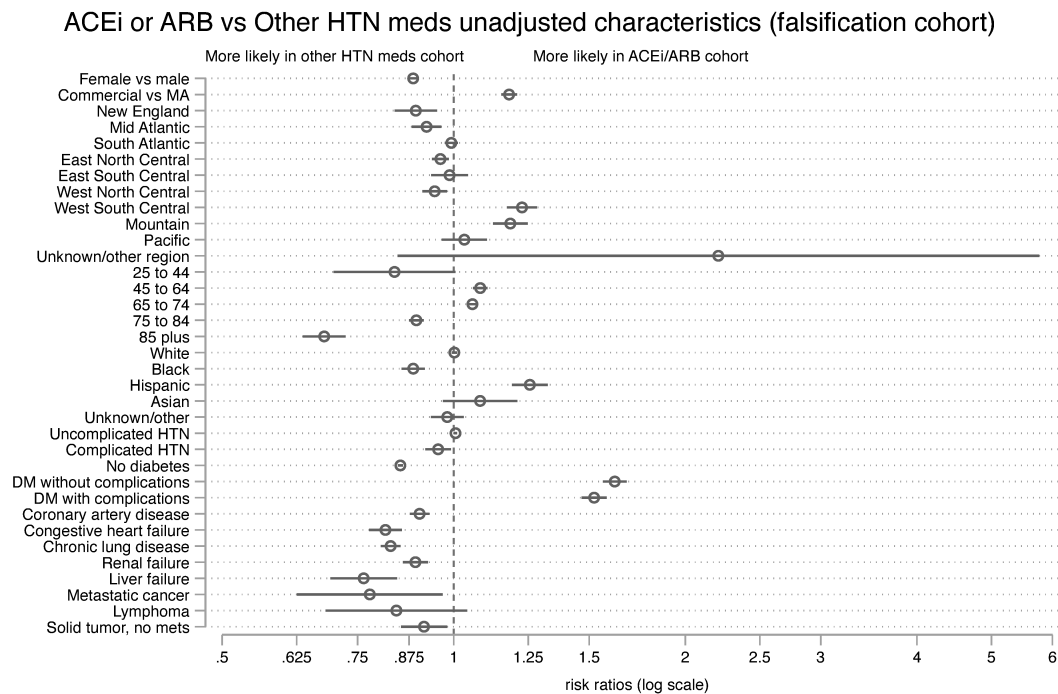

Figure Cb: The comparisons for six characteristics are not statistically significant after multiple comparison adjustment: solid tumor no mets (unadjusted  $p=0.01$ ; adjusted  $p=0.26$ ), coronary artery disease (unadjusted  $p=0.01$ ; adjusted  $p=0.31$ ), age 65 to 74 (unadjusted  $p=0.01$ ; adjusted  $p=0.35$ ), unknown/other race (unadjusted  $p=0.02$ ; adjusted  $p=0.36$ ), congestive heart failure (unadjusted  $p=0.02$ ; adjusted  $p=0.36$ ), Mountain (unadjusted  $p=0.03$ ; adjusted  $p=0.56$ )

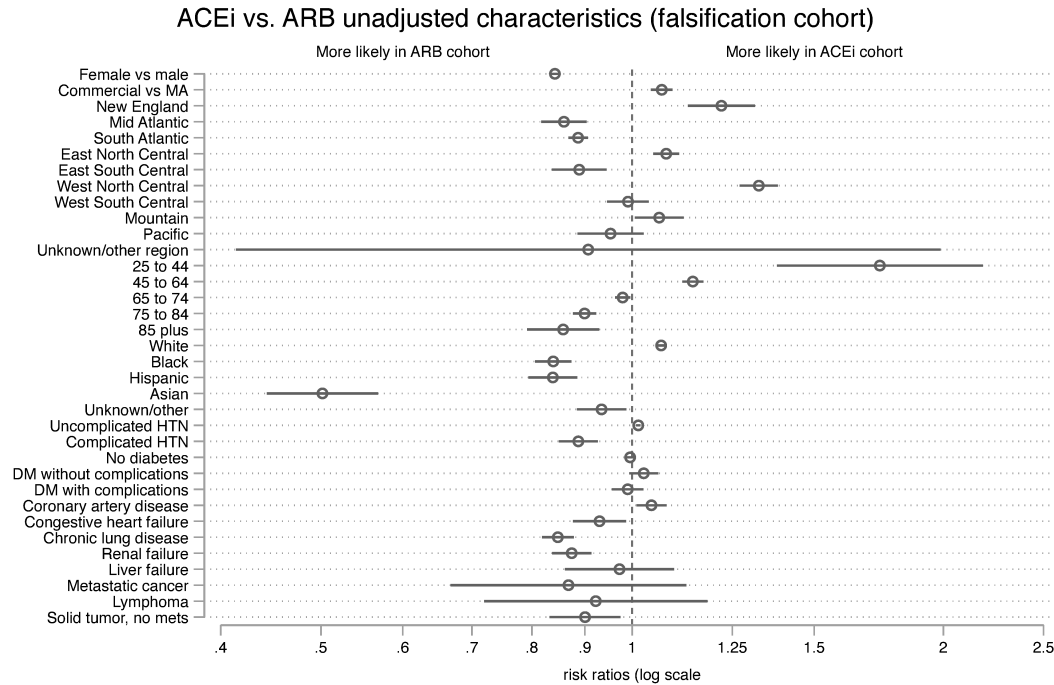

Table E: Data underlying Figure C (cohort comparison, falsification cohort)

|                            | ACEi or ARB vs other |                         |        |                     |                   | ACEi vs ARB |                         |        |                     |                   |
|----------------------------|----------------------|-------------------------|--------|---------------------|-------------------|-------------|-------------------------|--------|---------------------|-------------------|
|                            | Risk ratio           | 95% confidence interval |        | unadjusted p value* | adjusted p value† | Risk ratio  | 95% confidence interval |        | unadjusted p value* | adjusted p value† |
| Female                     | .8859                | .8770                   | .8948  | <0.001              | <0.001            | .8420       | .8317                   | .8524  | <0.001              | <0.001            |
| Commercial                 | 1.1805               | 1.1533                  | 1.2084 | <0.001              | <0.001            | 1.0683      | 1.0429                  | 1.0942 | <0.001              | <0.001            |
| New England                | .8928                | .8380                   | .9512  | <0.001              | 0.014             | 1.2200      | 1.1326                  | 1.3142 | <0.001              | <0.001            |
| Mid Atlantic               | .9221                | .8821                   | .9639  | <0.001              | 0.011             | .8591       | .8168                   | .9036  | <0.001              | <0.001            |
| South Atlantic             | .9931                | .9737                   | 1.0128 | 0.487               | 1.000             | .8867       | .8675                   | .9062  | <0.001              | <0.001            |
| East North Central         | .9612                | .9372                   | .9858  | 0.002               | 0.066             | 1.0789      | 1.0484                  | 1.1104 | <0.001              | <0.001            |
| East South Central         | .9877                | .9350                   | 1.0435 | 0.660               | 1.000             | .8888       | .8362                   | .9448  | <0.001              | 0.005             |
| West North Central         | .9447                | .9109                   | .9799  | 0.002               | 0.067             | 1.3260      | 1.2707                  | 1.3836 | <0.001              | <0.001            |
| West South Central         | 1.2269               | 1.1728                  | 1.2836 | <0.001              | <0.001            | .9909       | .9461                   | 1.0379 | 0.699               | 1.000             |
| Mountain                   | 1.1848               | 1.1247                  | 1.2481 | <0.001              | <0.001            | 1.0622      | 1.0060                  | 1.1216 | 0.030               | 0.562             |
| Pacific                    | 1.0325               | .9654                   | 1.1043 | 0.351               | 1.000             | .9531       | .8854                   | 1.0260 | 0.202               | 1.000             |
| Unknown region             | 2.2079               | .8453                   | 5.7670 | 0.097               | 1.000             | .9068       | .4138                   | 1.9871 | 0.807               | 1.000             |
| 25 to 44                   | .8377                | .6979                   | 1.0056 | 0.057               | 1.000             | 1.7362      | 1.3806                  | 2.1833 | <0.001              | <0.001            |
| 45 to 64                   | 1.0827               | 1.0593                  | 1.1067 | <0.001              | <0.001            | 1.1448      | 1.1180                  | 1.1723 | <0.001              | <0.001            |
| 65 to 74                   | 1.0578               | 1.0414                  | 1.0744 | <0.001              | <0.001            | .9792       | .9629                   | .9957  | 0.014               | 0.347             |
| 75 to 85                   | .8944                | .8749                   | .9142  | <0.001              | <0.001            | .8995       | .8768                   | .9228  | <0.001              | <0.001            |
| 85+                        | .6788                | .6370                   | .7234  | <0.001              | <0.001            | .8576       | .7915                   | .9292  | <0.001              | 0.006             |
| White                      | 1.0020               | .9940                   | 1.0100 | 0.631               | 1.000             | 1.0669      | 1.0573                  | 1.0765 | <0.001              | <0.001            |
| Black                      | .8860                | .8559                   | .9172  | <0.001              | <0.001            | .8389       | .8059                   | .8733  | <0.001              | <0.001            |
| Hispanic                   | 1.2560               | 1.1906                  | 1.3251 | <0.001              | <0.001            | .8381       | .7938                   | .8849  | <0.001              | <0.001            |
| Asian                      | 1.0824               | .9683                   | 1.2099 | 0.163               | 1.000             | .5017       | .4433                   | .5679  | <0.001              | <0.001            |
| Unknown/other race         | .9809                | .9339                   | 1.0303 | 0.442               | 1.000             | .9342       | .8843                   | .9869  | 0.015               | 0.361             |
| Uncomplicated hypertension | 1.0055               | 1.0009                  | 1.0101 | 0.018               | 0.392             | 1.0139      | 1.0088                  | 1.0190 | <0.001              | <0.001            |
| Complicated hypertension   | .9546                | .9187                   | .9920  | 0.018               | 0.392             | .8871       | .8496                   | .9263  | <0.001              | <0.001            |
| No diabetes                | .8526                | .8462                   | .8590  | <0.001              | <0.001            | .9956       | .9856                   | 1.0057 | 0.392               | 1.000             |
| Diabetes without CC        | 1.6192               | 1.5625                  | 1.6780 | <0.001              | <0.001            | 1.0262      | .9937                   | 1.0598 | 0.115               | 1.000             |
| Diabetes with CC           | 1.5226               | 1.4662                  | 1.5811 | <0.001              | <0.001            | .9902       | .9561                   | 1.0256 | 0.583               | 1.000             |
| Coronary artery disease    | .9030                | .8774                   | .9294  | <0.001              | <0.001            | 1.0440      | 1.0097                  | 1.0795 | 0.011               | 0.309             |
| Congestive heart failure   | .8153                | .7760                   | .8566  | <0.001              | <0.001            | .9300       | .8769                   | .9865  | 0.016               | 0.363             |
| Chronic pulmonary disease  | .8281                | .8040                   | .8530  | <0.001              | <0.001            | .8475       | .8181                   | .8779  | <0.001              | <0.001            |
| Renal failure              | .8917                | .8588                   | .9259  | <0.001              | <0.001            | .8742       | .8369                   | .9130  | <0.001              | <0.001            |
| Liver failure              | .7639                | .6912                   | .8442  | <0.001              | <0.001            | .9722       | .8609                   | 1.0978 | 0.649               | 1.000             |
| Metastatic cancer          | .7780                | .6255                   | .9678  | 0.024               | 0.476             | .8678       | .6673                   | 1.1285 | 0.290               | 1.000             |
| Lymphoma                   | .8424                | .6816                   | 1.0411 | 0.112               | 1.000             | .9222       | .7191                   | 1.1827 | 0.523               | 1.000             |
| Solid tumor (non-met)      | .9150                | .8539                   | .9805  | 0.012               | 0.309             | .9005       | .8321                   | .9745  | 0.009               | 0.261             |

\* P value is for the Pearson chi-squared test with one degree of freedom

† Adjusted p-values calculated following the Holm sequentially rejective procedure, treating all comparisons in this table as a single family of comparisons.

Table F: Complete regression results (falsification cohort)

|                     | Any complication <sup>†</sup> | Died same or next calendar month |
|---------------------|-------------------------------|----------------------------------|
| Other HTN meds only | ref.                          | ref.                             |
| ACEi                | 0.885*<br>(0.803,0.976)       | 0.792<br>(0.595,1.053)           |
| ARB                 | 0.818***<br>(0.738,0.908)     | 0.643**<br>(0.472,0.874)         |
| Commercial          | 0.658***<br>(0.569,0.762)     | 0.699<br>(0.400,1.221)           |
| Female=1            | 0.978<br>(0.896,1.068)        | 0.825<br>(0.635,1.072)           |
| 25-44               | 1.265<br>(0.738,2.170)        | 2.205<br>(0.291,16.723)          |
| 45-64               | ref.                          | ref.                             |
| 65-74               | 0.742***<br>(0.650,0.848)     | 1.505<br>(0.898,2.522)           |
| 75-84               | 0.759***<br>(0.655,0.880)     | 2.714***<br>(1.607,4.584)        |
| 85+                 | 1.117<br>(0.904,1.381)        | 9.209***<br>(5.225,16.233)       |
| New England         | ref                           | ref                              |
| Mid Atlantic        | 1.112<br>(0.865,1.431)        | 1.042<br>(0.487,2.232)           |
| South Atlantic      | 0.958<br>(0.767,1.196)        | 1.083<br>(0.551,2.130)           |
| E North Central     | 1.058<br>(0.844,1.325)        | 1.291<br>(0.657,2.538)           |
| E South Central     | 0.916<br>(0.693,1.211)        | 1.481<br>(0.670,3.272)           |
| W North Central     | 1.002<br>(0.787,1.277)        | 1.041<br>(0.494,2.195)           |
| W South Central     | 1.106<br>(0.859,1.424)        | 0.887<br>(0.387,2.031)           |
| Mountain            | 1.159<br>(0.893,1.506)        | 1.319<br>(0.594,2.929)           |
| Pacific             | 1.052<br>(0.781,1.419)        | 1.018<br>(0.392,2.642)           |
| Unk race            | 1.022<br>(0.865,1.207)        | 1.261<br>(0.781,2.036)           |
| White               | ref.                          | ref.                             |
| Black               | 1.054<br>(0.928,1.197)        | 1.417<br>(0.997,2.014)           |

|                                        | Any complication <sup>†</sup> | Died same or next calendar month |
|----------------------------------------|-------------------------------|----------------------------------|
| Hispanic                               | 0.924<br>(0.774,1.103)        | 0.968<br>(0.561,1.669)           |
| Asian                                  | 0.719<br>(0.482,1.071)        | 1.763<br>(0.761,4.085)           |
| Uncomp hypertension                    | ref.                          | ref.                             |
| Comp hypertension                      | 1.014<br>(0.852,1.206)        | 0.751<br>(0.488,1.156)           |
| Coronary art dis                       | 1.201***<br>(1.081,1.335)     | 1.895***<br>(1.449,2.479)        |
| Congest heart fail                     | 1.649***<br>(1.440,1.888)     | 2.028***<br>(1.499,2.745)        |
| Chronic pulmonary                      | 1.402***<br>(1.270,1.548)     | 1.779***<br>(1.359,2.329)        |
| No diabetes                            | ref.                          | ref.                             |
| Diabetes without CC                    | 0.958<br>(0.849,1.081)        | 1.273<br>(0.890,1.820)           |
| Diabetes with CC                       | 1.276***<br>(1.138,1.430)     | 1.779***<br>(1.328,2.383)        |
| Renal failure                          | 1.132<br>(0.953,1.344)        | 1.749**<br>(1.190,2.571)         |
| Liver failure                          | 1.332*<br>(1.017,1.745)       | 3.498***<br>(1.986,6.163)        |
| Metastatic cancer                      | 1.423<br>(0.820,2.469)        | 11.831***<br>(6.001,23.325)      |
| Lymphoma                               | 1.880*<br>(1.136,3.111)       | 1.176<br>(0.297,4.662)           |
| Non-metastatic solid tumor             | 1.105<br>(0.897,1.363)        | 1.011<br>(0.601,1.702)           |
| Rheumatoid/arthritis/collagen disorder | 1.203*<br>(1.024,1.414)       | 1.141<br>(0.692,1.882)           |
| Constant                               | 0.029***<br>(0.022,0.037)     | 0.001***<br>(0.000,0.002)        |
| Number of surgeries                    | 103,322                       | 103,152                          |
| Number of unique patients              | 93,686                        | 93,533                           |
| p (for regression)                     | <0.001                        | <0.001                           |
| pseudo R <sup>2</sup>                  | 0.014                         | 0.099                            |

Odds ratios presented after logistic regression

\* p<0.05, \*\* p<0.01, \*\*\* p<0.001

<sup>†</sup> Acute myocardial infarction or sepsis within 7 days of surgery; surgical site complication or pulmonary embolism within 30 days; and/or mechanical complication or periprosthetic wound infection/complication within 90 days
